# Supplementary material for: A single-bead telomere sensor based on fluorescence resonance energy transfer
Source: Royal Society of Chemistry journal article supplement (doi:10.1039/c5an02543e), 2016-01-01
Supplement: c5an02543e1.pdf [file c5an02543e1.pdf]

## A single-bead telomere sensor based on fluorescence resonance energy transfer

Xiao Fan<sup>a,#</sup>, Qiaoli Yue<sup>b,#</sup>, Yanyan Li<sup>a,#</sup>, Yingya Liu<sup>a</sup>, Lu-Lu Qu<sup>a</sup>, Yingnan Cao<sup>a</sup>, and Haitao Li<sup>a,c,\*</sup>

<sup>a</sup> Contribution from the School of Chemistry and Chemical Engineering, Jiangsu Normal University, Xuzhou 221116, China

<sup>b</sup> Department of Chemistry, Liaocheng University, Liaocheng 252059, China

<sup>c</sup> Department of Chemistry, Cambridge University, Cambridge CB2 1EW, UK

\* corresponding author:

Haitao Li

School of Chemistry and Chemical Engineering, Jiangsu Normal University, Xuzhou 221116, China

Tel, +8618905203826

Email: haitao@jsnu.edu.cn

#These authors are contributed equally to the manuscript

### Supplementary information:

Table S1 Dependability (Rs) of the single bead sensor which calculated by fluorescence intensity.

(A) calculated by peak area of fluorescence, (B) calculated by peak height of fluorescence.

| Sequence | Addition of ZnTCPP |           |       | Addition of Target DNA |           |       | RS         |
|----------|--------------------|-----------|-------|------------------------|-----------|-------|------------|
|          | IDonor             | IAcceptor | ID/IA | IDonor                 | IAcceptor | ID/IA |            |
| A I      | 10.98              | 32.14     | 0.34  | 39.03                  | 7.67      | 5.09  | 14.97±3.47 |
| II       | 11.96              | 31.39     | 0.38  | 39.88                  | 6.40      | 6.23  | 16.39±1.54 |
| III      | 16.33              | 27.53     | 0.59  | 40.45                  | 6.30      | 6.42  | 10.88±0.23 |
| VI       | 27.80              | 18.97     | 1.47  | 43.98                  | 3.94      | 11.17 | 7.60±0.06  |

|                 |     |       |       |      |       |       |       |            |
|-----------------|-----|-------|-------|------|-------|-------|-------|------------|
| V               |     | 39.91 | 7.55  | 5.29 | 44.38 | 0.73  | 60.96 | 11.52±0.22 |
| Non-binding DNA |     | 16.33 | 27.53 | 0.59 | 21.72 | 29.15 | 0.75  | 1.27       |
| B               | I   | 0.24  | 0.76  | 0.31 | 0.81  | 0.19  | 4.15  | 13.39±1.86 |
|                 | II  | 0.25  | 0.75  | 0.34 | 0.84  | 0.16  | 5.18  | 15.24±1.63 |
|                 | III | 0.35  | 0.65  | 0.53 | 0.84  | 0.16  | 5.12  | 9.66±0.31  |
|                 | VI  | 0.56  | 0.44  | 1.25 | 0.90  | 0.10  | 8.79  | 7.03±0.09  |
|                 | V   | 0.82  | 0.18  | 4.47 | 0.97  | 0.031 | 30.81 | 6.89±0.10  |
| Non-binding DNA |     | 0.35  | 0.65  | 0.53 | 0.41  | 0.59  | 0.70  | 1.32       |

Table S2. FRET efficiencies

| DNA sample | FRET efficiencies after addition of target DNA | FRET efficiencies between Crimson 625 and Alexa 488 |
|------------|------------------------------------------------|-----------------------------------------------------|
| Line 1     | 0.22±0.02                                      | 0.75 ±0.04                                          |
| Line 2     | 0.15±0.04                                      | 0.76±0.01                                           |
| Line 3     | 0.18±0.01                                      | 0.63±0.01                                           |
| Line 4     | 0.12±0                                         | 0.46±0                                              |
| Line 5     | 0.05±0                                         | 0.22±0                                              |

The single-bead FRET sensor was assumed to be homogeneous in solution. The concentration of

microspheres was calculated by equation:  $C = \frac{C_1 V_1}{V}$ , where  $C_1$ ,  $V_1$  is the original concentration ( $2.3 \times 10^{12}/\text{mL}$ ) and volume of microspheres solution (20  $\mu\text{L}$ ), respectively,  $V$  is total volume of solution.

There are two kinds of DNA distribution in a sensor solution. One was a high density state which bounded to the bead (local DNA) and another was for those DNA molecules in free solution. Here, the concentration of local DNA on a single microsphere was calculated by

$$C = \frac{N/N_A}{V}$$

equation:  $C = \frac{N/N_A}{V}$ , where N is the number of carboxyl groups on the surface of the a microsphere (*Analyst*, 2011, 136, 1599-1607),  $N_A$  is avogadro's number, V is volume of a microsphere.
